# Supplementary material for: Accumulating Mutations in Series of Haplotypes at the KIT and MITF Loci Are Major Determinants of White Markings in Franches-Montagnes Horses
Source: PLoS One. 2013 Sep 30;8(9):e75071. doi: 10.1371/journal.pone.0075071 (PMC3787084; doi:10.1371/journal.pone.0075071)
Supplement: Table S1 — NPs of the Illumina equine SNP50 genotyping array with significant association to white marking scores. (XLSX) [file pone.0075071.s003.xlsx]

## Sheet: Table S1
Supplementary Table S1:
all horses	total score				head score				fore-leg score				hind-leg score
	CHR	SNP	p-value		CHR	Position	p-value		CHR	Position	p-value		CHR	SNP	p-value
	16	CHR16.20147039	3.84e-15		16	CHR16.20147039	1.63e-23		23	CHR23.2603893	7.15e-07		3	CHR3.37725713	1.33e-09
	16	CHR16.20179799	1.11e-14		16	CHR16.20179799	1.22e-22		23	CHR23.11864935	8.31e-07		3	CHR3.36461592	2.78e-09
	3	CHR3.37725713	3.48e-11		16	CHR16.19894050	6.19e-15		16	CHR16.20179799	9.58e-07		3	CHR3.35408432	1.46e-08
	3	CHR3.35408432	1.19e-10		16	CHR16.19893970	7.09e-15		23	CHR23.2637658	9.78e-07		3	CHR3.72676163	4.58e-08
	3	CHR3.37540091	6.18e-10		3	CHR3.35408432	2.19e-13		16	CHR16.20147039	1.45e-06		3	CHR3.77545832	1.5e-07
	3	CHR3.77545832	4.84e-09		16	CHR16.21282004	2.75e-12		23	CHR23.3939055	5.04e-06		3	CHR3.35639914	3.93e-07
	16	CHR16.21282004	8.15e-09		16	CHR16.20508682	1.06e-11		23	CHR23.4031496	5.11e-06		3	CHR3.37540091	4.47e-07
	3	CHR3.37148447	8.45e-09		16	CHR16.20546073	1.38e-11		25	CHR25.33773673	6.59e-06		3	CHR3.37806266	4.83e-07
	3	CHR3.36979198	8.82e-09		16	CHR16.20546266	1.73e-11		23	CHR23.3944482	8.99e-06		3	CHR3.35661804	6.26e-07
	3	CHR3.37957578	1.3e-08		3	CHR3.37725713	2.54e-11		3	CHR3.77545832	1.11e-05		3	CHR3.37148447	7.09e-07
	3	CHR3.37957776	1.3e-08		16	CHR16.20720352	2.83e-11		20	CHR20.36411455	1.38e-05		3	CHR3.36979198	7.25e-07
	3	CHR3.35639914	1.52e-08		16	CHR16.17588677	8.03e-11		23	CHR23.4139129	1.72e-05		3	CHR3.38456968	8.23e-07
	3	CHR3.37548550	1.73e-08		3	CHR3.37540091	1.81e-10		20	CHR20.36518700	1.8e-05		3	CHR3.38637583	1.51e-06
	3	CHR3.37789700	2.16e-08		16	CHR16.19887946	2.36e-10		23	CHR23.6225768	2.14e-05		3	CHR3.37957578	2.38e-06
	3	CHR3.35661804	2.31e-08		3	CHR3.35661804	1.02e-09		24	CHR24.38319415	2.31e-05		3	CHR3.37957776	2.38e-06
	3	CHR3.37806266	2.51e-08		3	CHR3.37789700	1.1e-09		23	CHR23.4739287	3.53e-05		3	CHR3.37548550	2.64e-06
	3	CHR3.72676163	3.36e-08		3	CHR3.35639914	1.16e-09		11	CHR11.5609279	3.73e-05		3	CHR3.37789700	3.9e-06
	16	CHR16.19894050	4.28e-08		3	CHR3.37148447	1.18e-09		3	CHR3.17138831	4.31e-05		3	CHR3.37739907	8.77e-06
	16	CHR16.19893970	5.84e-08		3	CHR3.36979198	1.26e-09		23	CHR23.4739256	4.48e-05		16	CHR16.20147039	1.11e-05
	3	CHR3.37739907	6.55e-08		3	CHR3.37548550	1.28e-09		4	CHR4.99398440	4.49e-05		1	CHR1.150425249	1.12e-05
	3	CHR3.36461592	6.67e-08		3	CHR3.37957578	1.53e-09		18	CHR18.17127240	4.84e-05		1	CHR1.155795652	1.13e-05
	3	CHR3.37398507	3.34e-07		3	CHR3.37957776	1.53e-09		X	CHRX.18267849	4.86e-05		3	CHR3.45228417	1.14e-05
	16	CHR16.17588677	4.58e-07		3	CHR3.36461592	3.73e-09		23	CHR23.4042836	5.21e-05		23	CHR23.4031496	1.79e-05
	3	CHR3.38456968	6.1e-07		3	CHR3.37806266	1.28e-08		6	CHR6.49155183	5.65e-05		3	CHR3.73566775	2.04e-05
	16	CHR16.21677054	8.95e-07		3	CHR3.37398507	1.76e-08		X	CHRX.18271401	5.67e-05		3	CHR3.73562856	2.15e-05
	3	CHR3.73566775	9.96e-07		16	CHR16.21677054	1.8e-08		23	CHR23.4043010	6.26e-05		1	CHR1.155795720	2.36e-05
	3	CHR3.73562856	1.08e-06		3	CHR3.73566775	4.45e-08		11	CHR11.7652121	6.94e-05		16	CHR16.21232975	2.39e-05
	16	CHR16.20546073	1.21e-06		3	CHR3.73562856	5.33e-08		11	CHR11.6120687	7.21e-05		14	CHR14.77898468	2.43e-05
	3	CHR3.38637583	1.31e-06		3	CHR3.72676163	6.36e-08		21	CHR21.33356967	8.95e-05		3	CHR3.37398507	2.72e-05
	16	CHR16.20546266	1.44e-06		3	CHR3.37739907	9.76e-08		23	CHR23.8755943	9.14e-05		16	CHR16.20179799	2.74e-05
	16	CHR16.20508682	1.62e-06		16	CHR16.21232975	1.5e-07		23	CHR23.13864215	9.66e-05		25	CHR25.20136988	3.18e-05
	16	CHR16.20720352	2.35e-06		3	CHR3.73658246	1.58e-07		17	CHR17.54721760	9.95e-05		1	CHR1.150206680	3.57e-05
	3	CHR3.73658246	2.67e-06		3	CHR3.38456968	1.96e-07		23	CHR23.47205662	9.97e-05		3	CHR3.29440375	3.9e-05
	16	CHR16.21232975	3.51e-06		3	CHR3.38637583	2.43e-07						3	CHR3.62571499	4.42e-05
	3	CHR3.45228417	3.54e-06		16	CHR16.17754789	2.86e-07						3	CHR3.48519426	4.66e-05
	16	CHR16.19887946	4.01e-06		3	CHR3.77545832	3.77e-07						3	CHR3.35953765	5.32e-05
	3	CHR3.75713271	8.88e-06		16	CHR16.22827869	8.2e-07						3	CHR3.38050768	5.35e-05
	3	CHR3.75714055	1.47e-05		16	CHR16.19166272	9.54e-07						3	CHR3.38344351	6.01e-05
	3	CHR3.68056268	1.61e-05		3	CHR3.72764285	5.28e-06						3	CHR3.36977339	6.41e-05
	3	CHR3.38344351	1.89e-05		16	CHR16.23886963	5.52e-06						3	CHR3.35897049	6.42e-05
	3	CHR3.41635136	1.94e-05		3	CHR3.75713271	6.75e-06						3	CHR3.43140945	6.64e-05
	23	CHR23.2603893	2e-05		16	CHR16.22005338	8.56e-06						3	CHR3.72764285	7.34e-05
	25	CHR25.29621832	2.26e-05		3	CHR3.38344351	8.67e-06						16	CHR16.18031489	7.86e-05
	16	CHR16.17754789	2.27e-05		3	CHR3.75714055	9.29e-06						3	CHR3.73658246	8.09e-05
	3	CHR3.36977339	2.29e-05		16	CHR16.20729284	1.1e-05						12	CHR12.30149006	8.62e-05
	23	CHR23.4031496	2.59e-05		3	CHR3.38050768	1.4e-05						23	CHR23.4043010	9.16e-05
	23	CHR23.2637658	3e-05		16	CHR16.18727037	1.5e-05						16	CHR16.21677054	9.35e-05
	3	CHR3.72764285	3.3e-05		16	CHR16.25010737	2.77e-05
	16	CHR16.23886963	3.49e-05		3	CHR3.37806048	3.07e-05
	23	CHR23.3939055	3.51e-05		3	CHR3.77958594	3.34e-05
	3	CHR3.78398818	5e-05		16	CHR16.18031489	3.8e-05
	3	CHR3.62571499	5.1e-05		3	CHR3.77955108	3.96e-05
	3	CHR3.19281146	5.95e-05		16	CHR16.20730670	4.23e-05
	3	CHR3.76206156	6.07e-05		16	CHR16.21866171	4.62e-05
	3	CHR3.38050768	6.46e-05		16	CHR16.20717701	4.78e-05
	16	CHR16.18031489	7.13e-05		16	CHR16.20717966	4.78e-05
	3	CHR3.78402173	7.53e-05		3	CHR3.68597432	4.86e-05
	3	CHR3.78402249	7.73e-05		16	CHR16.18243382	5.2e-05
	25	CHR25.24465291	8.5e-05		3	CHR3.68056268	5.36e-05
	1	CHR1.155795652	9.02e-05		3	CHR3.36977339	5.62e-05
					3	CHR3.45228417	5.84e-05
					18	CHR18.19829380	6.29e-05
					3	CHR3.72413904	6.37e-05
					3	CHR3.33822506	6.51e-05
					3	CHR3.72889944	6.77e-05
					16	CHR16.18242801	7.15e-05
					5	CHR5.73105608	7.55e-05
					16	CHR16.22468598	7.82e-05
Bay horses	total score				head score				fore-leg score				hind-leg score
	CHR	Position	p-val		CHR	Position	p-val		CHR	Position	p-value		CHR	Position	p-value
	16	CHR16.20179799	3.68e-13		16	CHR16.20179799	2.06e-16		16	CHR16.20179799	6.16e-09		3	CHR3.72764285	2.12e-06
	16	CHR16.20147039	7.74e-13		16	CHR16.20147039	3.92e-16		16	CHR16.20147039	1.26e-08		3	CHR3.78222270	3.67e-06
	3	CHR3.77638829	6.37e-09		16	CHR16.19894050	6.95e-11		23	CHR23.11864935	5.97e-07		1	CHR1.150206680	6.07e-06
	16	CHR16.21677054	1.06e-08		16	CHR16.19893970	7.29e-11		3	CHR3.77638829	1.2e-06		3	CHR3.73562856	9.06e-06
	3	CHR3.78038953	1.22e-08		16	CHR16.20720352	5.76e-10		3	CHR3.77829267	1.87e-06		3	CHR3.73566775	9.06e-06
	3	CHR3.77829267	1.58e-08		16	CHR16.20508682	3.73e-09		3	CHR3.77664001	1.94e-06		1	CHR1.150425249	1.16e-05
	3	CHR3.77664001	1.61e-08		3	CHR3.76369772	3.86e-09		3	CHR3.77818231	2.48e-06		3	CHR3.77638829	1.19e-05
	3	CHR3.77818231	3.13e-08		16	CHR16.21282004	6.17e-09		3	CHR3.77918503	4.94e-06		3	CHR3.77664001	1.57e-05
	3	CHR3.78222270	4.91e-08		16	CHR16.17588677	9.52e-09		16	CHR16.21677054	7.27e-06		3	CHR3.77829267	1.61e-05
	3	CHR3.78081032	7.66e-08		16	CHR16.21677054	2.32e-08		3	CHR3.78038953	7.51e-06		1	CHR1.161122629	2.05e-05
	3	CHR3.76369772	1.07e-07		3	CHR3.78222270	2.42e-08		16	CHR16.17588677	1.09e-05		14	CHR14.77898468	2.13e-05
	3	CHR3.77918503	1.21e-07		16	CHR16.20546073	2.63e-08		1	CHR1.162120882	1.71e-05		3	CHR3.72676163	2.26e-05
	16	CHR16.17588677	1.62e-07		16	CHR16.20546266	3.53e-08		3	CHR3.67919003	2.49e-05		3	CHR3.77818231	2.27e-05
	16	CHR16.21282004	4.03e-07		3	CHR3.78038953	1.94e-07		3	CHR3.78081032	3.88e-05		3	CHR3.78038953	2.56e-05
	3	CHR3.76206156	4.84e-07		3	CHR3.76243793	2.25e-07		16	CHR16.14581937	5.95e-05		18	CHR18.3156252	3.17e-05
	3	CHR3.76243793	1.11e-06		3	CHR3.76206156	3.48e-07		3	CHR3.21272091	6.77e-05		3	CHR3.88566747	3.5e-05
	3	CHR3.72764285	1.21e-06		16	CHR16.19887946	6.37e-07		16	CHR16.23886963	8.07e-05		3	CHR3.76206156	3.62e-05
	16	CHR16.20720352	1.24e-06		3	CHR3.76243442	6.96e-07		3	CHR3.52577112	8.28e-05		3	CHR3.78081032	3.83e-05
	3	CHR3.77958467	2.34e-06		16	CHR16.22827869	9.07e-07		13	CHR13.40040292	8.53e-05		14	CHR14.76809338	4.28e-05
	16	CHR16.23886963	2.38e-06		16	CHR16.23886963	1.07e-06						28	CHR28.4256973	4.33e-05
	3	CHR3.77958594	2.75e-06		3	CHR3.78081032	1.3e-06						16	CHR16.21677054	5.65e-05
	3	CHR3.76243442	3.22e-06		16	CHR16.18727037	1.3e-06						3	CHR3.77918503	6.56e-05
	16	CHR16.20508682	3.47e-06		3	CHR3.77638829	1.61e-06						12	CHR12.4853521	6.81e-05
	3	CHR3.77955411	4.35e-06		16	CHR16.17754789	3.21e-06						3	CHR3.76369772	6.98e-05
	3	CHR3.73562856	4.96e-06		3	CHR3.77829267	3.85e-06						3	CHR3.73658246	9.6e-05
	3	CHR3.73566775	4.96e-06		3	CHR3.77664001	3.89e-06
	3	CHR3.74216796	5.33e-06		14	CHR14.47013141	4.92e-06
	3	CHR3.77948939	5.53e-06		3	CHR3.77818231	6.98e-06
	3	CHR3.77955108	5.68e-06		16	CHR16.18031489	1.03e-05
	3	CHR3.77545832	7.6e-06		14	CHR14.46964589	1.05e-05
	3	CHR3.72676163	7.73e-06		14	CHR14.46960829	1.07e-05
	3	CHR3.52577112	9.8e-06		16	CHR16.20729284	1.21e-05
	16	CHR16.14581937	1.05e-05		16	CHR16.21232975	1.31e-05
	18	CHR18.14590036	1.13e-05		3	CHR3.77958467	1.61e-05
	16	CHR16.20546073	1.26e-05		3	CHR3.77958594	1.66e-05
	16	CHR16.20546266	1.56e-05		3	CHR3.70397758	1.69e-05
	16	CHR16.19894050	1.61e-05		30	CHR30.28921306	1.7e-05
	3	CHR3.74220209	1.77e-05		3	CHR3.77918503	1.77e-05
	1	CHR1.36510986	1.78e-05		3	CHR3.74216796	1.83e-05
	1	CHR1.158553659	1.9e-05		3	CHR3.77955108	1.89e-05
	1	CHR1.150206680	1.93e-05		16	CHR16.19709427	1.96e-05
	16	CHR16.19893970	1.97e-05		3	CHR3.77955411	2.78e-05
	1	CHR1.36571589	2.15e-05		3	CHR3.74097249	2.8e-05
	16	CHR16.18031489	2.21e-05		16	CHR16.19166272	3.02e-05
	3	CHR3.74220278	2.89e-05		3	CHR3.72764285	3.1e-05
	1	CHR1.36358664	3.12e-05		3	CHR3.75009519	3.1e-05
	23	CHR23.11864935	3.18e-05		3	CHR3.77948939	3.22e-05
	1	CHR1.36362146	3.39e-05		16	CHR16.14581937	3.27e-05
	3	CHR3.64037089	3.4e-05		16	CHR16.22468598	3.32e-05
	1	CHR1.36450681	3.56e-05		3	CHR3.73562856	4.6e-05
	3	CHR3.21272091	4.05e-05		3	CHR3.73566775	4.6e-05
	16	CHR16.21232975	5.21e-05		3	CHR3.61057502	4.81e-05
	16	CHR16.22827869	5.44e-05		3	CHR3.72676163	5.15e-05
	14	CHR14.76809338	5.52e-05		16	CHR16.25180536	5.6e-05
	3	CHR3.73658246	6.85e-05		X	CHRX.25957318	6.76e-05
	28	CHR28.12393836	7.22e-05		3	CHR3.77545832	7.34e-05
	16	CHR16.19709427	8.95e-05		3	CHR3.78480461	7.37e-05
	32	CHRX.25957318	9.05e-05		3	CHR3.74220278	7.78e-05
					16	CHR16.24756344	8e-05
					3	CHR3.21272091	9e-05
Chestnut horses	total score				head score				fore-leg score				hind-leg score
	CHR	Position	p-val		CHR	Position	p-val		CHR	Position	p-value		CHR	Position	p-value
	16	CHR16.19894050	3.89e-08		16	CHR16.19894050	2.35e-13		25	CHR25.16907385	3.17e-06		3	CHR3.72676163	6.69e-06
	16	CHR16.19893970	4.71e-08		16	CHR16.19893970	2.76e-13		25	CHR25.16880886	5.64e-06		16	CHR16.21232975	1.68e-05
	21	CHR21.33356967	8.2e-07		16	CHR16.20147039	1.37e-12		25	CHR25.17358888	1.83e-05		3	CHR3.77545832	1.96e-05
	3	CHR3.77545832	1.08e-06		16	CHR16.20179799	9.15e-12		21	CHR21.33356967	2.41e-05		11	CHR11.2867571	2.34e-05
	16	CHR16.17754789	1.79e-06		16	CHR16.21282004	4.13e-10		25	CHR25.16908446	3.74e-05		11	CHR11.2916253	4.7e-05
	16	CHR16.21282004	2.44e-06		16	CHR16.20546073	2.97e-09		25	CHR25.22649207	5.91e-05		21	CHR21.15829662	5.39e-05
	16	CHR16.20147039	2.65e-06		16	CHR16.20546266	2.97e-09		17	CHR17.74041723	6.33e-05		21	CHR21.15049510	5.65e-05
	3	CHR3.75714055	4.5e-06		16	CHR16.20720352	3.55e-09		25	CHR25.24465291	7.23e-05		21	CHR21.15049839	5.65e-05
	3	CHR3.75713271	6.35e-06		16	CHR16.19887946	6.47e-09		3	CHR3.74282957	7.29e-05		21	CHR21.15053623	5.65e-05
	16	CHR16.20179799	6.52e-06		16	CHR16.20508682	2.96e-08		25	CHR25.12383034	7.83e-05		17	CHR17.23217213	6.2e-05
	16	CHR16.19887946	7.21e-06		16	CHR16.17754789	7.73e-08		25	CHR25.18298767	8.63e-05		11	CHR11.2916332	6.3e-05
	16	CHR16.20717701	7.77e-06		16	CHR16.20717701	2.3e-07
	16	CHR16.20717966	7.77e-06		16	CHR16.20717966	2.3e-07
	16	CHR16.21232975	9.25e-06		16	CHR16.21232975	2.4e-07
	3	CHR3.72676163	9.65e-06		3	CHR3.73566775	4.73e-07
	25	CHR25.21245148	1.2e-05		3	CHR3.73562856	6.62e-07
	26	CHR26.22651534	2.03e-05		3	CHR3.75714055	7.74e-07
	25	CHR25.19669134	2.13e-05		3	CHR3.73658246	8.06e-07
	25	CHR25.21239813	2.17e-05		3	CHR3.75713271	1.72e-06
	3	CHR3.78398818	3.01e-05		21	CHR21.33356967	2.4e-06
	16	CHR16.20546073	4.03e-05		16	CHR16.17588677	2.54e-06
	16	CHR16.20546266	4.03e-05		16	CHR16.20729284	4.14e-06
	16	CHR16.20720352	4.97e-05		3	CHR3.78492252	5.48e-06
	25	CHR25.24465291	5.23e-05		3	CHR3.78492544	5.48e-06
	25	CHR25.18768518	5.24e-05		16	CHR16.19166272	8.49e-06
	3	CHR3.72413904	5.93e-05		3	CHR3.72413904	1.14e-05
	25	CHR25.18769015	6.78e-05		3	CHR3.72676163	1.64e-05
	16	CHR16.21326779	7.82e-05		16	CHR16.18242801	1.95e-05
					16	CHR16.18243382	1.95e-05
					3	CHR3.77545832	2.65e-05
					16	CHR16.21326779	2.9e-05
					16	CHR16.15134110	3.52e-05
					31	CHR31.11290101	3.54e-05
					16	CHR16.24192718	5e-05
					16	CHR16.18334682	5.54e-05
					1	CHR1.55034558	6.71e-05
					3	CHR3.74844444	8.49e-05
					16	CHR16.15931868	8.78e-05
					3	CHR3.72889944	9.49e-05
					16	CHR16.18031489	9.68e-05

## Sheet: Sheet1
CHR16	20147039	CHR16.20147039
CHR16	20179799	CHR16.20179799
CHR3	37725713	CHR3.37725713
CHR3	35408432	CHR3.35408432
CHR3	37540091	CHR3.37540091
CHR3	77545832	CHR3.77545832
CHR16	21282004	CHR16.21282004
CHR3	37148447	CHR3.37148447
CHR3	36979198	CHR3.36979198
CHR3	37957578	CHR3.37957578
CHR3	37957776	CHR3.37957776
CHR3	35639914	CHR3.35639914
CHR3	37548550	CHR3.37548550
CHR3	37789700	CHR3.37789700
CHR3	35661804	CHR3.35661804
CHR3	37806266	CHR3.37806266
CHR3	72676163	CHR3.72676163
CHR16	19894050	CHR16.19894050
CHR16	19893970	CHR16.19893970
CHR3	37739907	CHR3.37739907
CHR3	36461592	CHR3.36461592
CHR3	37398507	CHR3.37398507
CHR16	17588677	CHR16.17588677
CHR3	38456968	CHR3.38456968
CHR16	21677054	CHR16.21677054
CHR3	73566775	CHR3.73566775
CHR3	73562856	CHR3.73562856
CHR16	20546073	CHR16.20546073
CHR3	38637583	CHR3.38637583
CHR16	20546266	CHR16.20546266		CHR16.20147039
CHR16	20508682	CHR16.20508682		CHR16.20179799
CHR16	20720352	CHR16.20720352		CHR3.37725713
CHR3	73658246	CHR3.73658246		CHR3.35408432
CHR16	21232975	CHR16.21232975		CHR3.37540091
CHR3	45228417	CHR3.45228417		CHR3.77545832
CHR16	19887946	CHR16.19887946		CHR16.21282004
CHR3	75713271	CHR3.75713271		CHR3.37148447
CHR3	75714055	CHR3.75714055		CHR3.36979198
CHR3	68056268	CHR3.68056268		CHR3.37957578
CHR3	38344351	CHR3.38344351		CHR3.37957776
CHR3	41635136	CHR3.41635136		CHR3.35639914
CHR23	2603893	CHR23.2603893		CHR3.37548550
CHR25	29621832	CHR25.29621832		CHR3.37789700
CHR16	17754789	CHR16.17754789		CHR3.35661804
CHR3	36977339	CHR3.36977339		CHR3.37806266
CHR23	4031496	CHR23.4031496		CHR3.72676163
CHR23	2637658	CHR23.2637658		CHR16.19894050
CHR3	72764285	CHR3.72764285		CHR16.19893970
CHR16	23886963	CHR16.23886963		CHR3.37739907
CHR23	3939055	CHR23.3939055		CHR3.36461592
CHR3	78398818	CHR3.78398818		CHR3.37398507
CHR3	62571499	CHR3.62571499		CHR16.17588677
CHR3	19281146	CHR3.19281146		CHR3.38456968
CHR3	76206156	CHR3.76206156		CHR16.21677054
CHR3	38050768	CHR3.38050768		CHR3.73566775
CHR16	18031489	CHR16.18031489		CHR3.73562856
CHR3	78402173	CHR3.78402173		CHR16.20546073
CHR3	78402249	CHR3.78402249		CHR3.38637583
CHR25	24465291	CHR25.24465291		CHR16.20546266
CHR1	155795652	CHR1.155795652		CHR16.20508682
				CHR16.20720352
				CHR3.73658246
				CHR16.21232975
				CHR3.45228417
				CHR16.19887946
				CHR3.75713271
				CHR3.75714055
				CHR3.68056268
				CHR3.38344351
				CHR3.41635136
				CHR23.2603893
				CHR25.29621832
				CHR16.17754789
				CHR3.36977339
				CHR23.4031496
				CHR23.2637658
				CHR3.72764285
				CHR16.23886963
				CHR23.3939055
				CHR3.78398818
				CHR3.62571499
				CHR3.19281146
				CHR3.76206156
				CHR3.38050768
				CHR16.18031489
				CHR3.78402173
				CHR3.78402249
				CHR25.24465291
				CHR1.155795652
