# Supplementary material for: Accumulating Mutations in Series of Haplotypes at the KIT and MITF Loci Are Major Determinants of White Markings in Franches-Montagnes Horses
Source: PLoS One. 2013 Sep 30;8(9):e75071. doi: 10.1371/journal.pone.0075071 (PMC3787084; doi:10.1371/journal.pone.0075071)
Supplement: Table S3 — Variants identified in the re-sequenced MITF interval. (XLSX) [file pone.0075071.s005.xlsx]

## Sheet: Table S3
Supplementary Table S3
Chromosome	Position	Reference	Individual 1	Individual 2
16	g.20105394	T	C	T
16	g.20105607	T	C	T
16	g.20106267	T	A	T
16	g.20106297	A	G	A
16	g.20106427	C	G	C
16	g.20109506	T	C	T
16	g.20110223	C	C	A
16	g.20110667	T	G	T
16	g.20111699	A	T	A
16	g.20112120	T	T	G
16	g.20112860	A	A	G
16	g.20113152	T	T	C
16	g.20113176	C	C	T
16	g.20113466	T	C	T
16	g.20115148	C	T	C
16	g.20119384	A	A	G
16	g.20123507	C	T	C
16	g.20123963	G	A	G
16	g.20124104	T	C	T
16	g.20124262	T	T	C
16	g.20124566	T	C	T
16	g.20126316	T	T	C
16	g.20126824	C	T	C
16	g.20126948	C	G	C
16	g.20127557	T	C	T
16	g.20127762	G	C	G
16	g.20128176	T	T	C
16	g.20128483	A	A	T
16	g.20128843	C	T	C
16	g.20129679	G	G	A
16	g.20129999	C	G	C
16	g.20130486	T	T	A
16	g.20130637	A	A	T
16	g.20130808	G	A	G
16	g.20130829	T	C	T
16	g.20131457	T	T	A
16	g.20132288	T	C	T
16	g.20132716	G	A	G
16	g.20133171	G	A	G
16	g.20134378	A	C	A
16	g.20134747	T	A	T
16	g.20134800	C	C	:
16	g.20135238	G	:	G
16	g.20135241	A	:	A
16	g.20135242	A	:	A
16	g.20135798	G	G	A
16	g.20136095	C	T	C
16	g.20136329	:	A	:
16	g.20136465	T	C	T
16	g.20137289	G	A	G
16	g.20137997	G	G	A
16	g.20138215	T	C	T
16	g.20138682	A	G	A
16	g.20138901	C	T	C
16	g.20139609	T	C	T
16	g.20140131	G	A	G
16	g.20140485	G	:	G
16	g.20140487	T	C	T
16	g.20140488	T	A	T
16	g.20140489	T	:	T
16	g.20140490	C	:	C
16	g.20140492	A	:	A
16	g.20140767	T	C	T
16	g.20145634	G	A	G
16	g.20147040	A	A	C
16	g.20147319	C	A	C
16	g.20148366	C	T	C
16	g.20148625	C	C	T
16	g.20149763	A	T	A
16	g.20151195	T	T	G
16	g.20154400	C	T	C
16	g.20155757	G	A	G
16	g.20159603	A	A	T
16	g.20160266	T	C	T
16	g.20160464	T	C	T
16	g.20160827	G	C	G
16	g.20161102	G	A	G
16	g.20161358	A	G	A
16	g.20161403	T	T	A
16	g.20161576	G	A	G
16	g.20161904	C	C	T
16	g.20163337	C	T	C
16	g.20163691	C	C	T
16	g.20165961	A	T	A
16	g.20166473	C	C	G
16	g.20167410	C	A	C
16	g.20168089	G	A	G
16	g.20168975	T	C	T
16	g.20170326	C	C	T
16	g.20170357	C	T	C
16	g.20170680	A	A	C
16	g.20173126	:	G	:
16	g.20174337	G	A	G
16	g.20174897	G	G	A
16	g.20178254	C	C	T
16	g.20178305	T	T	G
16	g.20178456	C	C	T
16	g.20179812	C	C	T
16	g.20179983	G	C	G
16	g.20181305	G	G	A
16	g.20181696	A	G	A
16	g.20182151	A	G	A
16	g.20182171	C	C	G
16	g.20188003	G	T	G
16	g.20188534	T	C	T
16	g.20188771	A	T	A
16	g.20189997	C	C	T
16	g.20190807	C	G	C
16	g.20191572	A	G	A
16	g.20192426	C	A	C
16	g.20192551	G	G	A
16	g.20192554	:	:	G
16	g.20192558	:	:	G
16	g.20192559	D	:	A
16	g.20192560	:	:	A
16	g.20192561	N	N	T
16	g.20192563	:	N	:
16	g.20192574	A	:	A
16	g.20192575	A	T	A
16	g.20193082	T	C	T
16	g.20193283	C	C	T
16	g.20194793	T	G	T
16	g.20194871	A	G	A
16	g.20195504	C	T	C
16	g.20196303	C	C	T
16	g.20196513	T	G	T
16	g.20198046	G	G	A
16	g.20199048	G	A	G
16	g.20201885	G	A	G
16	g.20205731	G	G	C
16	g.20205914	A	A	C
16	g.20206396	A	C	A
16	g.20207826	T	C	T
16	g.20207843	A	G	A
16	g.20208253	T	C	T
16	g.20208846	T	C	T
16	g.20209778	T	C	T
16	g.20210339	T	C	T
16	g.20210440	A	T	A
16	g.20211614	C	G	C
16	g.20211924	:	:	T
16	g.20211925	:	:	C
16	g.20211926	:	:	A
16	g.20211927	:	:	T
16	g.20212163	A	G	A
16	g.20212622	A	G	A
16	g.20213504	A	G	A
16	g.20213866	T	T	A
16	g.20218711	C	A	C
16	g.20220716	G	:	G
16	g.20223259	A	T	A
